# Supplementary material for: Thermally accessible triplet state of π-nucleophiles does exist. Evidence from first principles study of ethylene interaction with copper species
Source: Royal Society of Chemistry journal article supplement (doi:10.1039/c4ra12422g), 2015-01-01
Supplement: c4ra12422g1.pdf [file c4ra12422g1.pdf]

# Thermally accessible triplet state of $\pi$ -nucleophiles does exist. Evidence from first principles study of ethylene interaction with copper species

Sergey V. Bondarchuk<sup>\*a</sup> and Boris F. Minaev<sup>a,b</sup>

---

<sup>a</sup> Department of Organic Chemistry, Bogdan Khmelnytsky Cherkasy National University, blvd. Shevchenko 81, 18031 Cherkasy, Ukraine. Fax: (+3) 80472 37-21-42; Tel: (+3) 80472 37-65-76;

E-mail: bondchem@cdu.edu.ua

<sup>b</sup> Department of Theoretical Chemistry and Biochemistry, Royal Institute of Technology, AlbaNova, S-106 91 Stockholm, Sweden

## SUPPORTING INFORMATION

*RSC Advances*

## LIST OF SUPPLEMENTARY FIGURES AND TABLES:

|                                                                                                                                                                                                                                                                                    |    |
|------------------------------------------------------------------------------------------------------------------------------------------------------------------------------------------------------------------------------------------------------------------------------------|----|
| <b>Figure S1.</b> Six possible adsorption sites of ethylene on the Cu(100) surface.....                                                                                                                                                                                            | 3  |
| <b>Figure S2.</b> Bond critical points, which are found in the supercell content.....                                                                                                                                                                                              | 3  |
| <b>Figure S3.</b> Electronic band structure (left) and partial density of states (right) plots of clean Cu(100) surface (top) and covered by ethylene (bottom).....                                                                                                                | 4  |
| <b>Figure S4.</b> Structures of the odd-numbered copper clusters optimized by the DFT(UM06)/LANL2DZ method in ethanol medium. Blue labels correspond to the point group symmetry.....                                                                                              | 5  |
| <b>Figure S5.</b> Correlation of different parameters with the number of copper atoms $n$ : a) the SOMO-LUMO gap; b) spin density on the reacting copper atom; c) vibrational frequencies of the band I and II; d) the C=C Laplacian bond order and the $\pi\sigma$ parameter..... | 6  |
| <b>Table S1.</b> The single-occupied (SOMO) and the lowest unoccupied (LUMO) molecular orbital energies of the calculated copper clusters; $\Delta E$ is the SOMO-LUMO energy gap.....                                                                                             | 6  |
| <b>Table S2.</b> Coordination numbers and free valence values of the carbon atoms in the $C_2H_4/Cu_n$ complexes.....                                                                                                                                                              | 7  |
| <b>Figure S6.</b> Selected structural and QTAIM topological parameters of the $C_2H_4/Cu^+$ and $C_2H_4/Cu^{2+}$ complexes. Pink circles indicate the bond critical points between the ethylene moieties and copper ion.....                                                       | 7  |
| <b>Figure S7.</b> Calculated IR spectra of the $C_2H_4/Cu$ complex in the $\tilde{X}^2A'$ (blue) and ${}^2B_2$ (red) states. The band I and II are indicated by vertical arrows.....                                                                                               | 8  |
| <b>Figure S8.</b> Calculated UV-vis spectra of the $C_2H_4/Cu$ complex in the $\tilde{X}^2A'$ (blue) and ${}^2B_2$ (red) states.....                                                                                                                                               | 8  |
| <b>Table S3.</b> Performance of different functionals in prediction of the two experimentally observed bands in the UV-vis spectrum of the $C_2H_4/Cu$ complex ( $\tilde{X}^2A'$ state).....                                                                                       | 8  |
| <b>Figure S9.</b> Energies of frontier molecular orbitals of the $C_2H_4/Cu$ complex ( ${}^2B_2$ state) as function of the C–Cu interatomic distance.....                                                                                                                          | 9  |
| <b>Figure S10.</b> The QST3-optimized transition state structure and the related minima (top); the corresponding IRC path (bottom).....                                                                                                                                            | 10 |

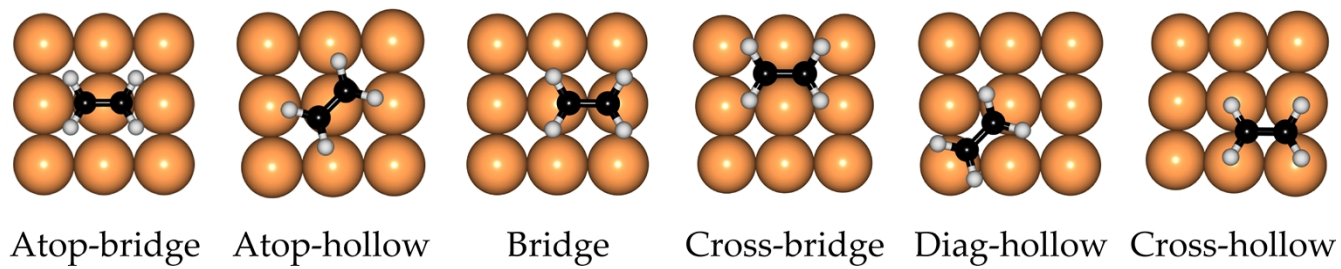

**Figure S1.** Six possible adsorption sites of ethylene on Cu(100) surface.

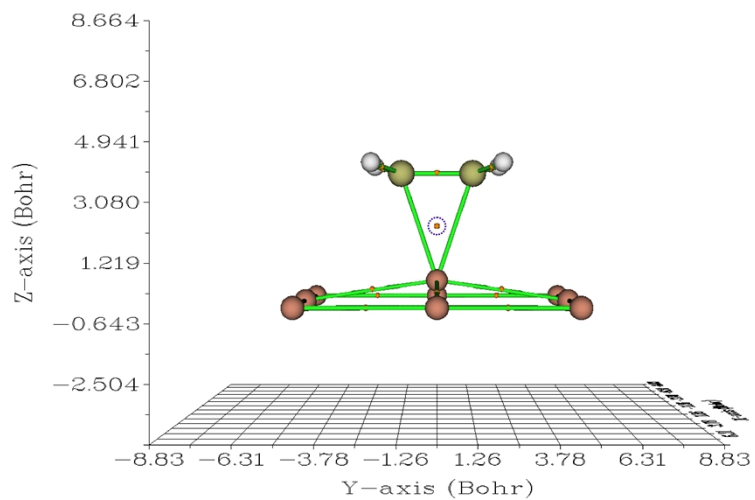

**Figure S2.** Bond critical points, which are found in the supercell content.

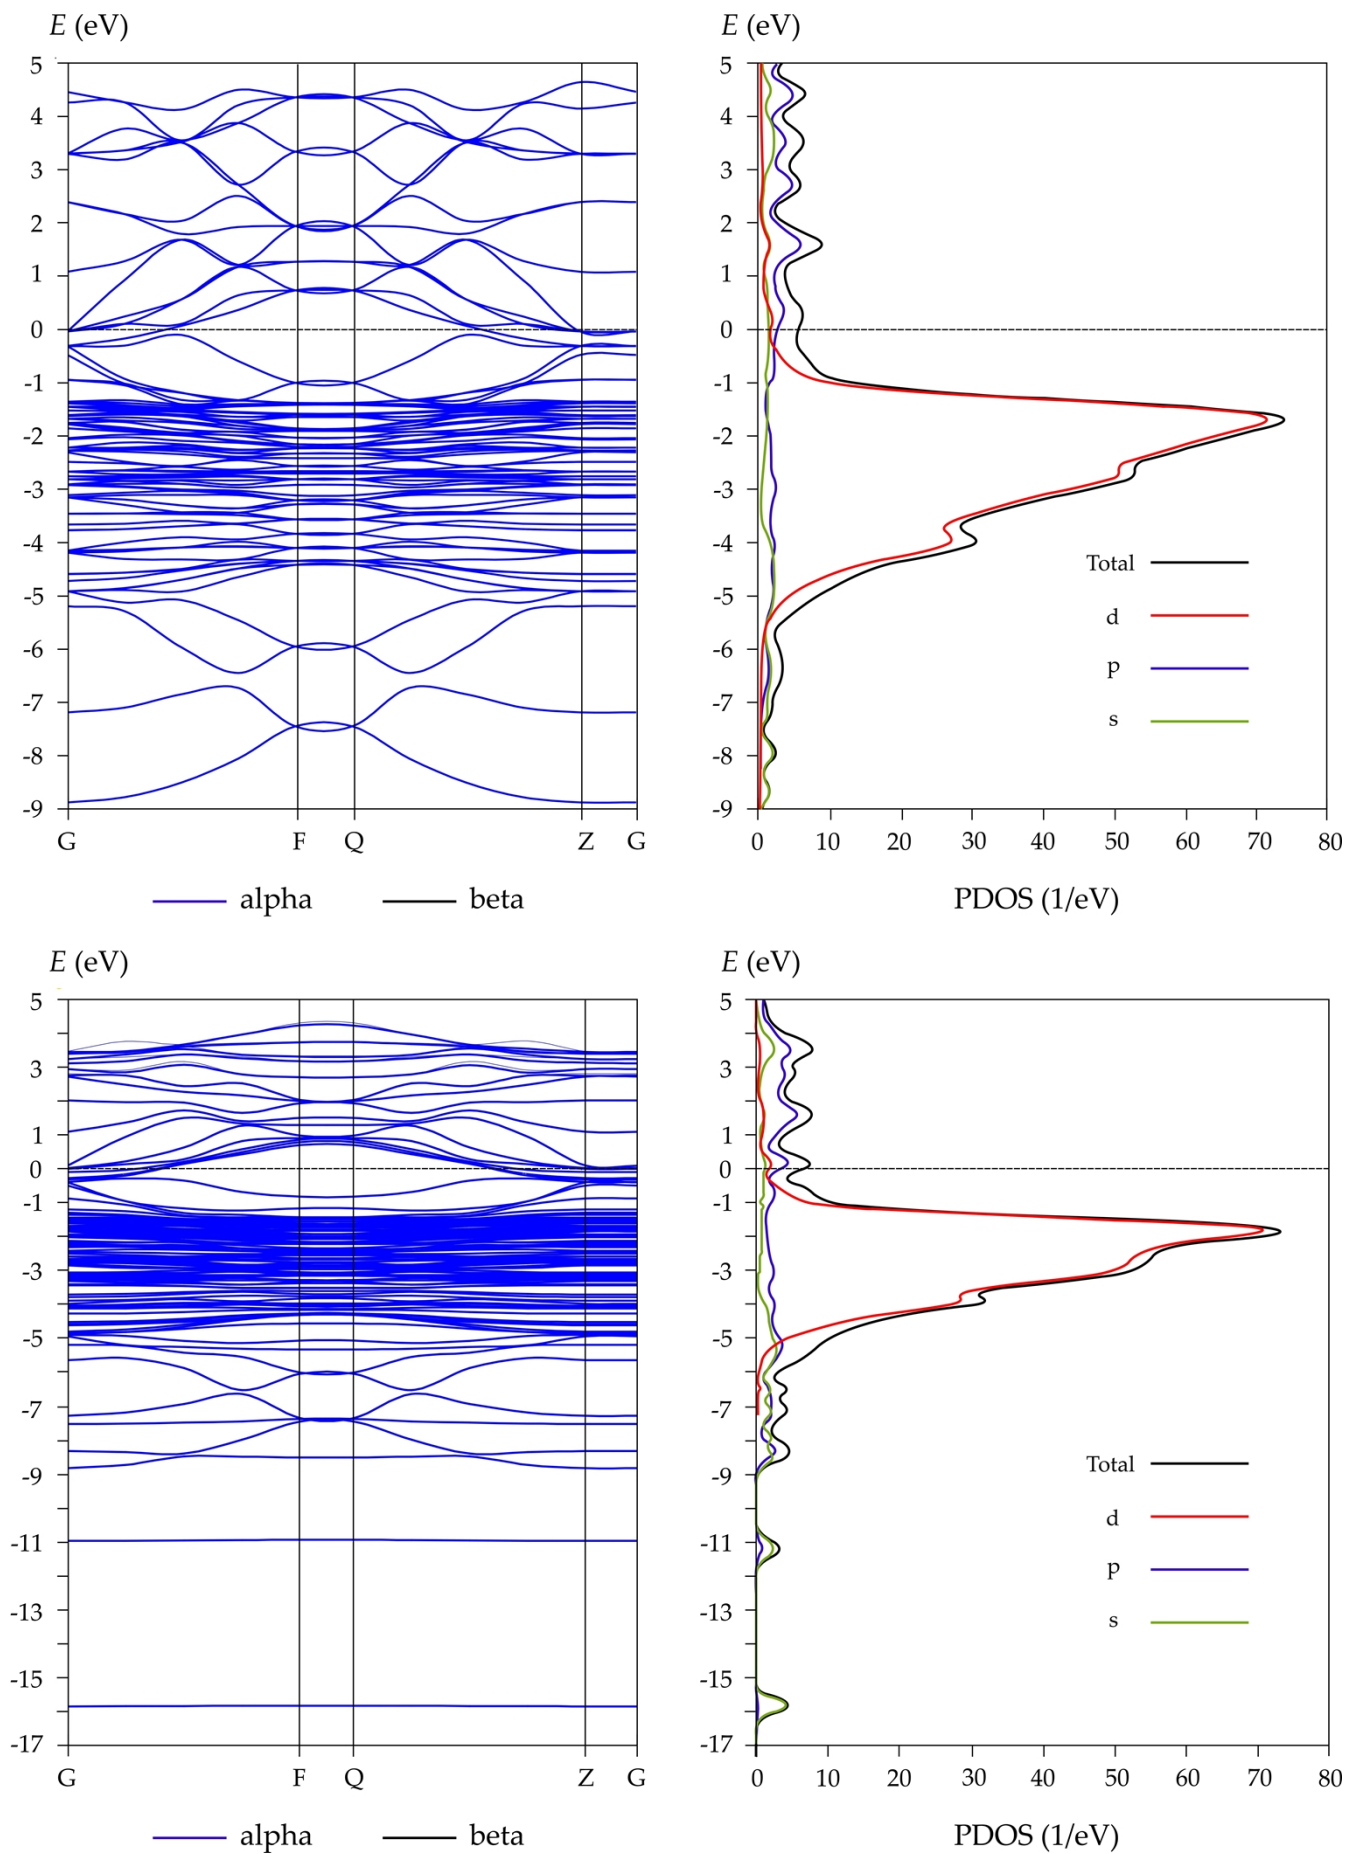

**Figure S3.** Electronic band structure (left) and partial density of states (right) plots of clean Cu(100) surface (top) and covered by ethylene (bottom).

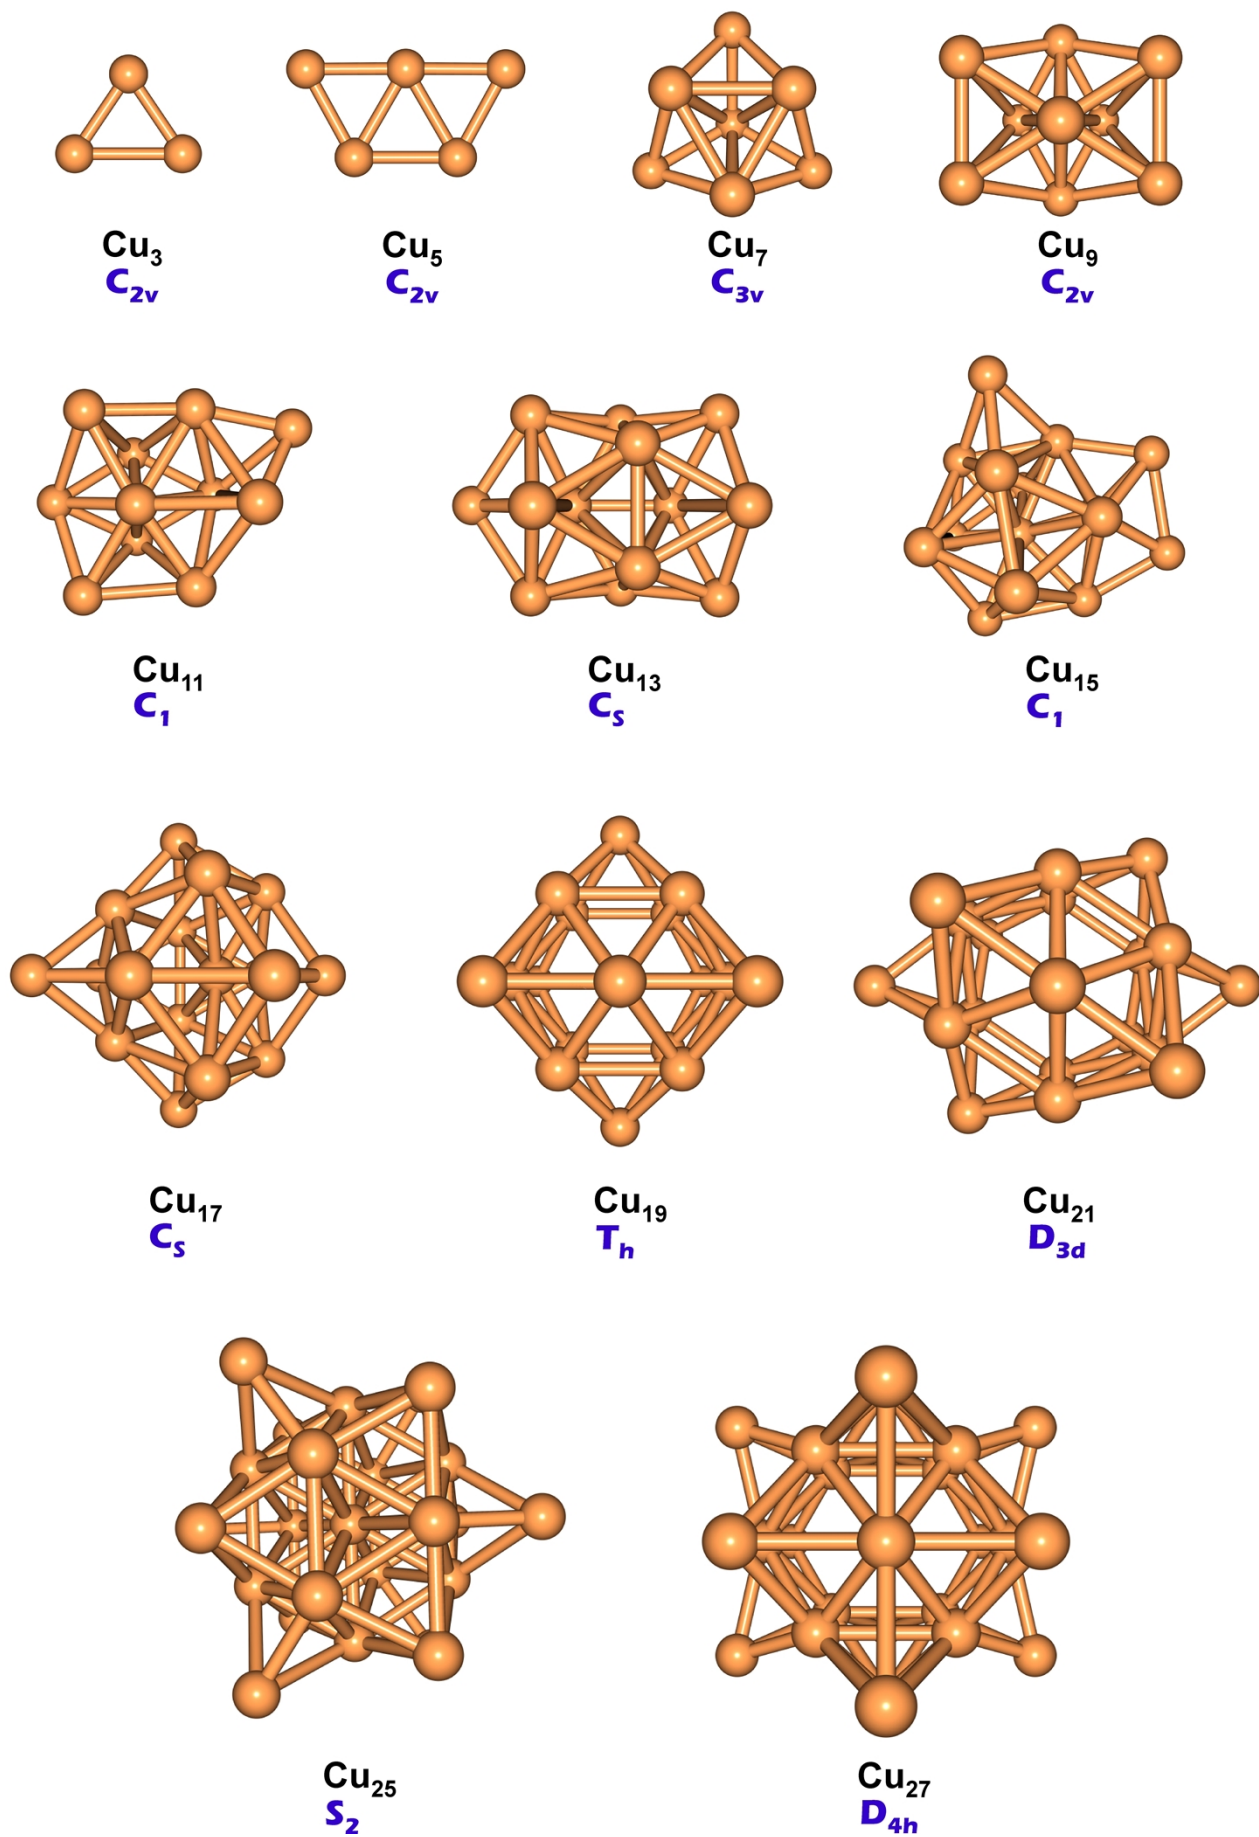

**Figure S4.** Structures of the odd-numbered copper clusters optimized by the DFT(UM06)/LANL2DZ method in ethanol medium. Blue labels correspond to the point group symmetry.

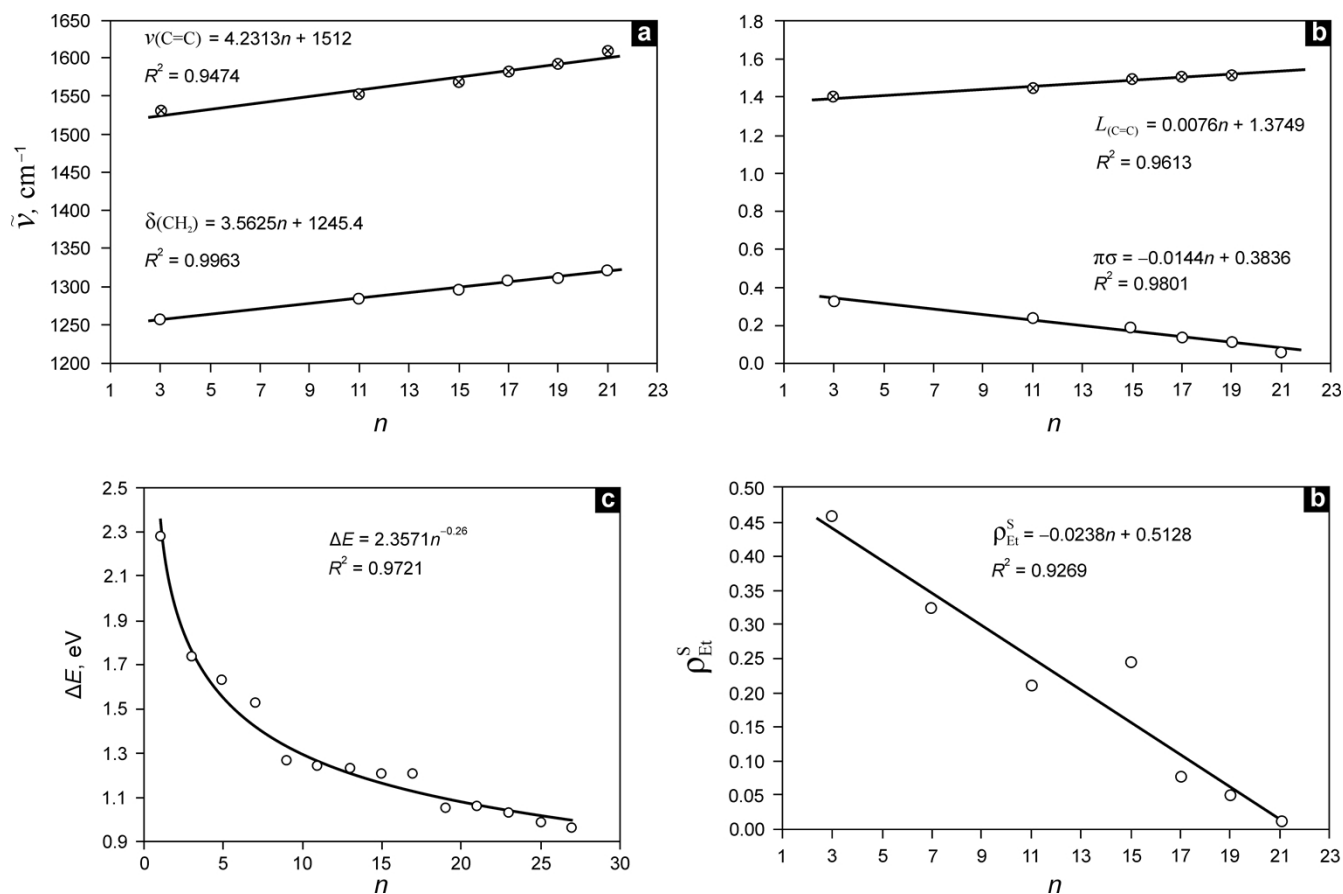

**Figure S5.** Correlation of different parameters with the number of copper atoms  $n$ : a) vibrational frequencies of the band I and II; b) the C=C Laplacian bond order and the  $\pi\sigma$  parameter; c) the SOMO-LUMO gap; d) spin density on the reacting copper atom.

**Table S1.** The SOMO and the LUMO energies of the calculated copper clusters;  $\Delta E$  is the SOMO-LUMO energy gap.

| $n$ | $E_{\text{SOMO}}$ , eV | $E_{\text{LUMO}}$ , eV | $\Delta E$ , eV |
|-----|------------------------|------------------------|-----------------|
| 1   | -5.03                  | -2.75                  | 2.28            |
| 3   | -3.87                  | -2.13                  | 1.74            |
| 5   | -4.50                  | -2.88                  | 1.63            |
| 7   | -4.56                  | -3.03                  | 1.53            |
| 9   | -3.81                  | -2.54                  | 1.27            |
| 11  | -4.10                  | -2.85                  | 1.25            |
| 13  | -4.15                  | -2.91                  | 1.23            |
| 15  | -4.23                  | -3.02                  | 1.21            |
| 17  | -4.67                  | -3.46                  | 1.21            |
| 19  | -4.52                  | -3.47                  | 1.05            |
| 21  | -4.56                  | -3.49                  | 1.06            |
| 23  | -3.98                  | -2.94                  | 1.04            |
| 25  | -4.31                  | -3.32                  | 0.98            |
| 27  | -4.19                  | -3.23                  | 0.96            |

**Table S2.** Coordination numbers and free valence values of the carbon atoms in the C<sub>2</sub>H<sub>4</sub>/Cu<sub>n</sub> complexes.

| <i>n</i> | Coordination number <sup>a</sup> |        | Free valence <sup>b</sup> |        |
|----------|----------------------------------|--------|---------------------------|--------|
|          | C1                               | C2     | C1                        | C2     |
| 3        | 3.9490                           | 3.9490 | 0.0022                    | 0.0020 |
| 7        | 3.9320                           | 3.9330 | 0.0055                    | 0.0054 |
| 11       | 3.9822                           | 3.9612 | 0.0015                    | 0.0029 |
| 15       | 3.9281                           | 3.9189 | 0.0008                    | 0.0007 |
| 17       | 3.9170                           | 3.9047 | 0.0002                    | 0.0003 |
| 19       | 3.9244                           | 3.9244 | 0.0010                    | 0.0010 |
| 21       | 3.9042                           | 3.9051 | 0.0021                    | 0.0016 |

<sup>a</sup> Calculated as the following:<sup>S1</sup>

$$CN_A = \sum_{B \neq A} \frac{1}{1 + \exp(-16 \cdot ((4/3)(R_A + R_B) / r - 1))}$$

Herein *R* is covalent radius taken from Ref. S2.

<sup>b</sup> Calculated as the following:<sup>S3</sup>

$$F_A = V_A - \sum_{\substack{B \\ B \neq A}} B_{AB} = \sum_{\mu, \nu} (\mathbf{P}^S \mathbf{S}^A)_{\mu\nu} (\mathbf{P}^S \mathbf{S}^A)_{\nu\mu}$$

where  $\mathbf{P}^S$  is the spin density;  $V_A$  is the total valence of atom *A* and is calculated according to the following equation:

$$V_A = 2Q_A - \sum_{\mu, \nu} (\mathbf{D} \mathbf{S}^A)_{\mu\nu} (\mathbf{D} \mathbf{S}^A)_{\nu\mu}$$

Herein  $Q_A$  is Hirshfeld's atomic population;  $\mathbf{D}$  is total density.<sup>S3</sup>

<sup>S1</sup>Grimme, S.; Antony, J.; Ehrlich, S.; Krieg, H. A Consistent and Accurate ab initio Parametrization of Density Functional Dispersion Correction (DFT-D) for the 94 Elements H–Pu. *J. Chem. Phys.* **2010**, *132*, 154104.

<sup>S2</sup>Pykkö, P.; Atsumi, M. Molecular Single-Bond Covalent Radii for Elements 1–118. *Chem.—Eur. J.* **2008**, *15*, 186–197.

<sup>S3</sup>Mayer, I.; Salvador, P. Overlap Populations, Bond Orders and Valences for “Fuzzy” Atoms. *Chem. Phys. Lett.* **2004**, *383*, 368–375.

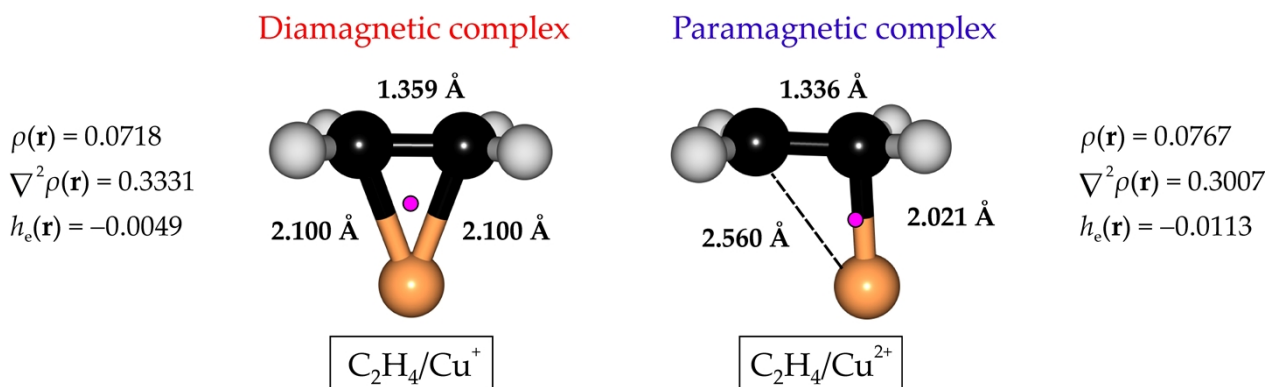

**Figure S6.** Selected structural and QTAIM topological parameters of the C<sub>2</sub>H<sub>4</sub>/Cu<sup>+</sup> and C<sub>2</sub>H<sub>4</sub>/Cu<sup>2+</sup> complexes. Magenta circles indicate the bond critical points between the ethylene moieties and the copper ion.

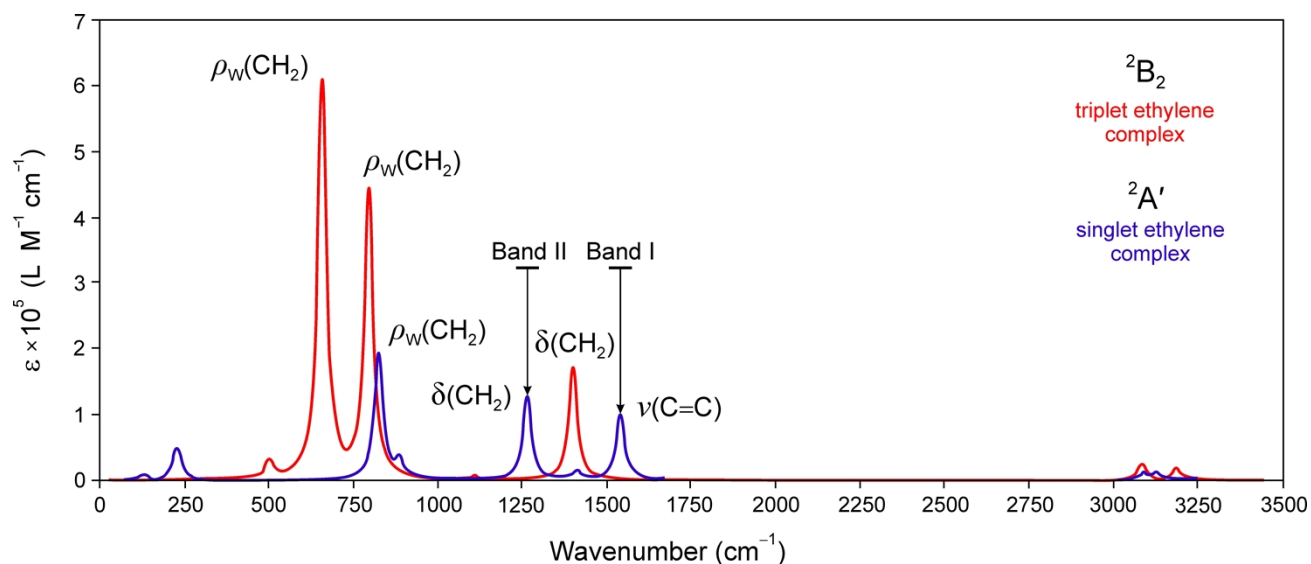

**Figure S7.** Calculated IR spectra of the  $C_2H_4/Cu$  complex in the  ${}^2A'$  (blue) and  ${}^2B_2$  (red) states. The band I and II are indicated by vertical arrows.

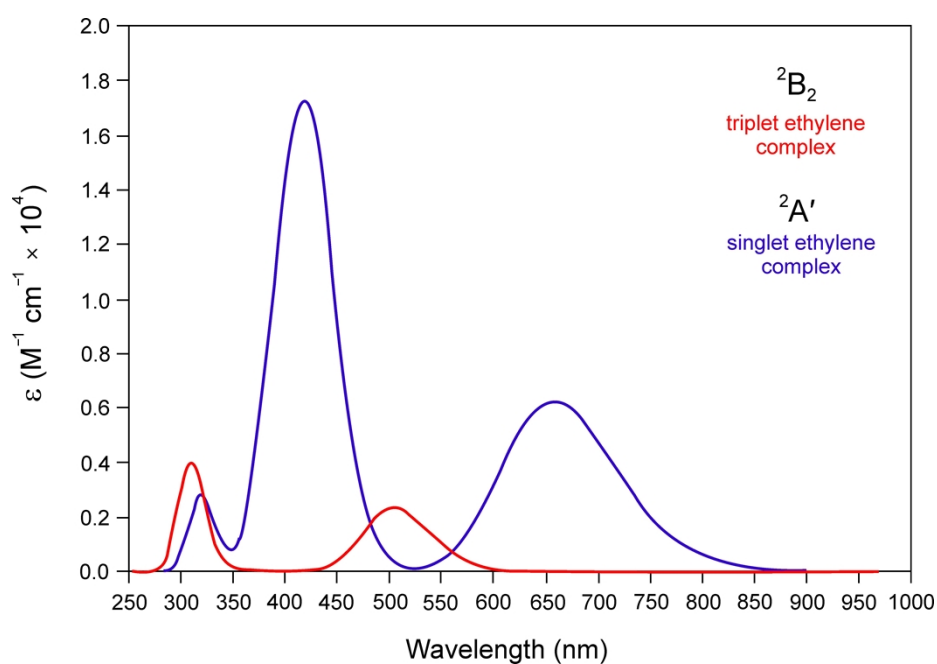

**Figure S8.** Calculated UV-vis spectra of the  $C_2H_4/Cu$  complex in the  ${}^2A'$  (blue) and  ${}^2B_2$  (red) states.

**Table S3.** Performance of different functionals in prediction of the two experimentally observed bands in the UV-vis spectrum of the  $C_2H_4/Cu$  complex ( ${}^2A'$  state).

| M062X | BMK | B3LYP | PBE0 | HSE06 | $\omega$ B97XD | B97D | mPW1PW91 | BH&HLYP | CAM-B3LYP |
|-------|-----|-------|------|-------|----------------|------|----------|---------|-----------|
| 441   | 392 | 398   | 412  | 405   | 415            | 394  | 408      | 424     | 398       |
| 344   | 313 | 338   | 333  | 331   | 323            | –    | 331      | 337     | 319       |



# Mixing SOMO and LUMO

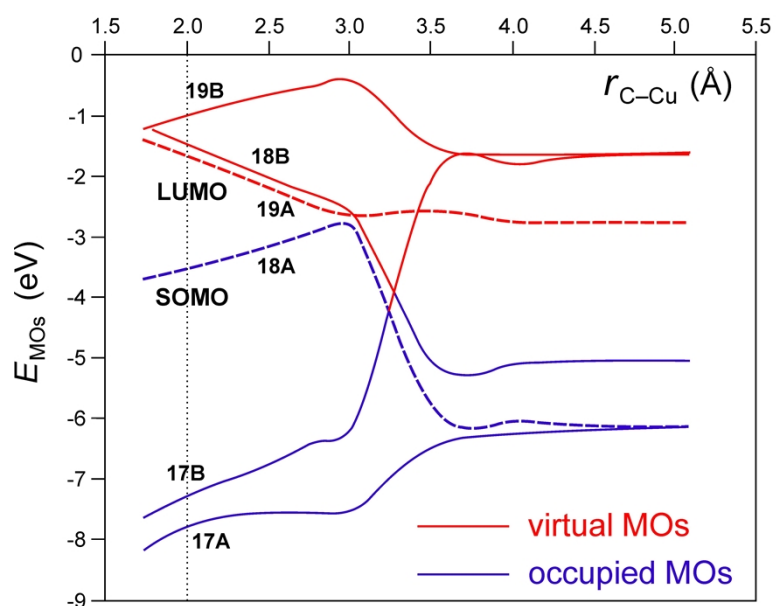

Equilibrium distance

Without mixing

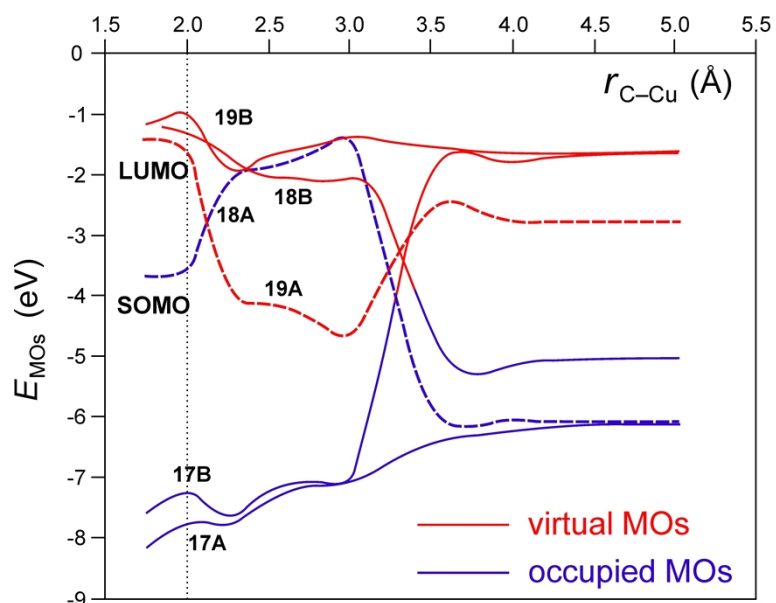

**ALPHA**

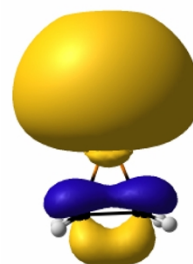

**19A a<sub>1</sub>**

**LUMO**

$\pi_{C=C} + Cu(4s)$

**BETA**

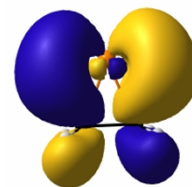

**19B b<sub>2</sub>**

$\pi^*_{C=C} + Cu(3d)$

**SOMO**

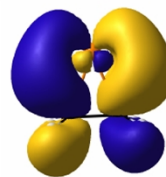

**18A b<sub>2</sub>**

$\pi^*_{C=C} + Cu(3d)$

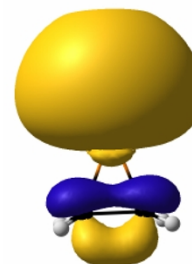

**18B a<sub>1</sub>**

$\pi_{C=C} + Cu(4s)$

$\pi_{C=C} + Cu(3d)$

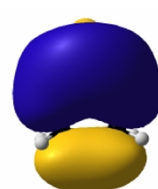

**17B a<sub>1</sub>**

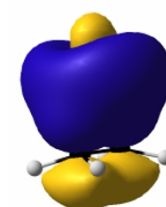

**17A a<sub>1</sub>**

**Figure S9.** Energies of frontier molecular orbitals of the  $C_2H_4/Cu$  complex ( ${}^2B_2$  state) as function of the C–Cu interatomic distance.

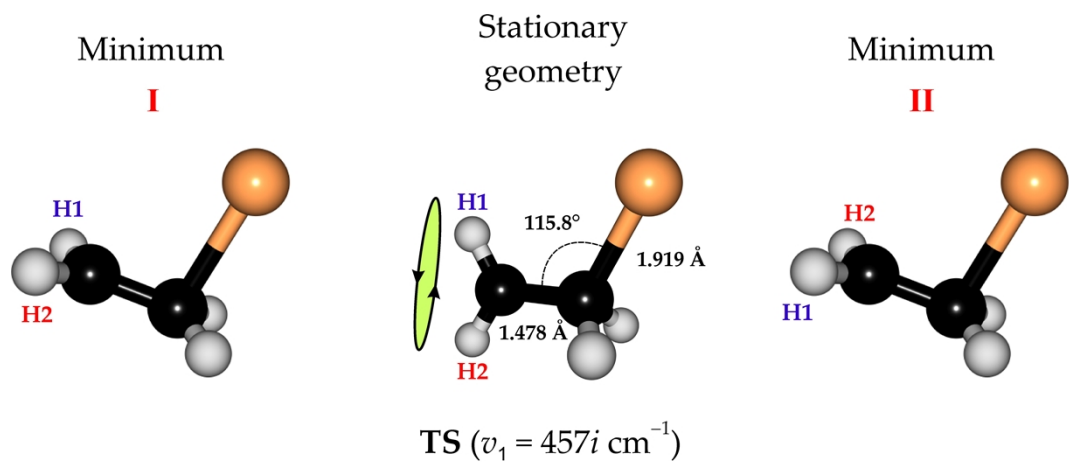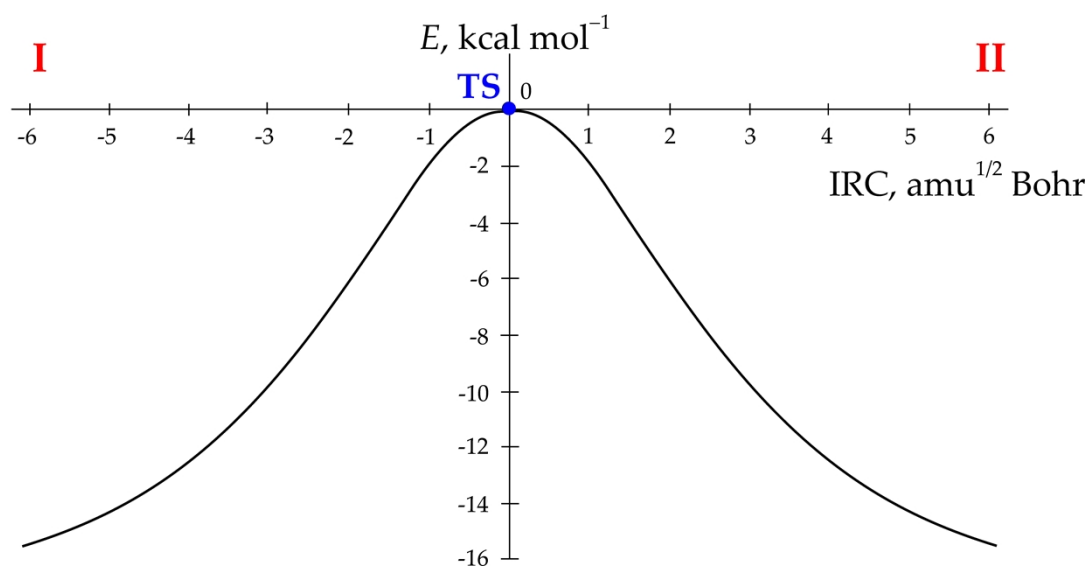

**Figure S10.** The QST3-optimized transition state structure and the related minima (top); the corresponding IRC path (bottom).
